# Supplementary material
Source: Springer Nature journal article supplement (https://www.springermedizin.de/resource/supplementary/12889_2013_5098_MOESM2_ESM.pdf/9494646)
Supplement: MOESM2 [file 9494646]

Randomisation of Occupational Physicians (OPs)

OPs in intervention group (N=32)  
are trained in 2011

OPs in usual care group (N=34)

Registration of sick leave and return-to-work data in the registration system of the Occupational Health Service during 1 year of all workers sick listed due to common mental disorders (CMD) counselled by an OP participating in the study.

Invite workers sick-listed due to CMD who are counselled by an OP participating in the study (after first consult with OP).

Potential participants are contacted by telephone to check inclusion and exclusion criteria.

Informed consent and the first questionnaire (baseline, T0).

Workers in intervention group  
receive questionnaires (during 1  
year) at:

- 3 months (T1)
- 6 months (T2)
- 12 months (T3)

In case of approval:

- the supervisor receives a questionnaire after 2 months

Workers in usual care group  
receive questionnaires (during 1  
year) at:

- 3 months (T1)
- 6 months (T2)
- 12 months (T3)

In case of approval:

- the supervisor receives a questionnaire after 2 months
